# Supplementary material for: Metabolic alteration of Catharanthus roseus cell suspension cultures overexpressing geraniol synthase in the plastids or cytosol
Source: PubMed Central journal article supplement (PMC6445406; doi:10.1007/s11240-018-1398-5), 2018-02-24
Supplement: 11240_2018_1398_MOESM1_ESM.pdf [file 11240_2018_1398_MOESM1_ESM.pdf]

**Supplement 1** The primer sequences used for designing full-length cDNA of *Catharanthus roseus* geraniol synthase (*CrGES*) or a truncated version without its plastidial leader peptide ( $\Delta$ pl*CrGES*). Construct no. 1 and 2 are the inserts for constitutive expression. Construct no. 3 and 4 are the inserts for transient expression.

| No | Constructs                                            | Primer sequences                      |                                         |
|----|-------------------------------------------------------|---------------------------------------|-----------------------------------------|
|    |                                                       | Forward                               | Reverse                                 |
| 1. | <i>Sall</i> - <i>CrGES</i> - <i>Xba</i> I             | 5'-GTCGACAAAATGGCAGCCACAATTAGTAACC-3' | 5'-TCTAGATTA AAAACAAGGTGTAAAAACAAAGC-3' |
| 2. | <i>Sall</i> - $\Delta$ pl <i>CrGES</i> - <i>Xba</i> I | 5'-GTCGACAAAATGTCTCTGCCTTTGGCAACT-3'  | 5'-TCTAGATTA AAAACAAGGTGTAAAAACAAAGC-3' |
| 3. | <i>Sall</i> - <i>CrGES</i> - <i>Sall</i>              | 5'-GTCGACAAAATGGCAGCCACAATTAGTAACC-3' | 5'-GTCGACAAAACAAGGTGTAAAAACAAAGC-3'     |
| 4. | <i>Sall</i> - $\Delta$ pl <i>CrGES</i> - <i>Sall</i>  | 5'-GTCGACAAAATGTCTCTGCCTTTGGCAACT-3'  | 5'-GTCGACAAAACAAGGTGTAAAAACAAAGC-3'     |
