# Supplementary material for: Metabolic alteration of Catharanthus roseus cell suspension cultures overexpressing geraniol synthase in the plastids or cytosol
Source: PubMed Central journal article supplement (PMC6445406; doi:10.1007/s11240-018-1398-5), 2018-02-24
Supplement: 11240_2018_1398_MOESM2_ESM.pdf [file 11240_2018_1398_MOESM2_ESM.pdf]

**A**

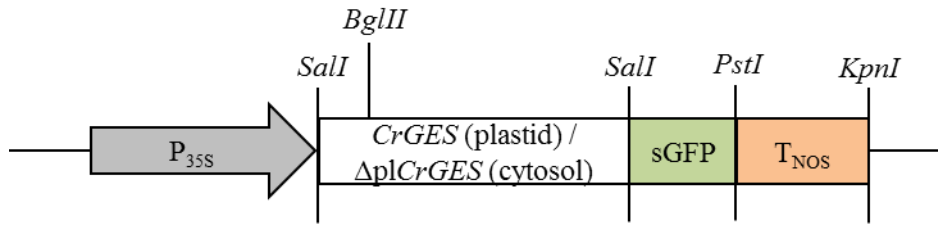

**B**

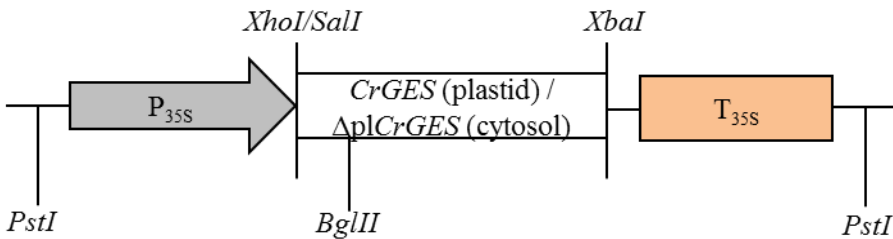

**Supplement 2** Schematic representation of the constructs A) pTH2- $\Delta EcoRI$  (Niwa 2003) and B) pRT101 (Töpfer et al. 1987) vectors containing either the full-length fragment of *Catharanthus roseus* geraniol synthase ( $CrGES$ ) or the truncated  $CrGES$  without plastidial leader peptide ( $\Delta plCrGES$ ) that are targeting the enzyme to the plastid or the cytosol, respectively.  $P_{35S}$ : cauliflower mosaic virus 35S promoter, sGFP: synthetic green fluorescence protein (S65T),  $T_{NOS}$ : nopaline synthase terminator,  $T_{35S}$ : cauliflower mosaic virus 35S terminator.
