# Supplementary material for: Metabolic alteration of Catharanthus roseus cell suspension cultures overexpressing geraniol synthase in the plastids or cytosol
Source: PubMed Central journal article supplement (PMC6445406; doi:10.1007/s11240-018-1398-5), 2018-02-24
Supplement: 11240_2018_1398_MOESM3_ESM.pdf [file 11240_2018_1398_MOESM3_ESM.pdf]

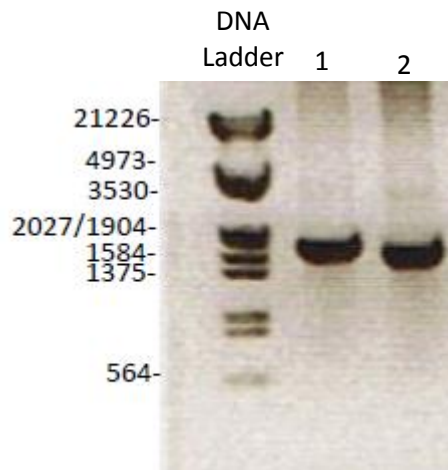

**Supplement 3** The PCR products cut with restriction enzymes *SalI* and *XbaI* examined by gel electrophoresis. 1) full-length fragment of *Catharanthus roseus* geraniol synthase (*CrGES*; about 1.8 kb). 2) fragment encoding truncated *CrGES* without plastidial leader peptide ( $\Delta$ pl*CrGES*; about 1.6 kb).
