# Supplementary material for: Metabolic alteration of Catharanthus roseus cell suspension cultures overexpressing geraniol synthase in the plastids or cytosol
Source: PubMed Central journal article supplement (PMC6445406; doi:10.1007/s11240-018-1398-5), 2018-02-24
Supplement: 11240_2018_1398_MOESM4_ESM.pdf [file 11240_2018_1398_MOESM4_ESM.pdf]

**A**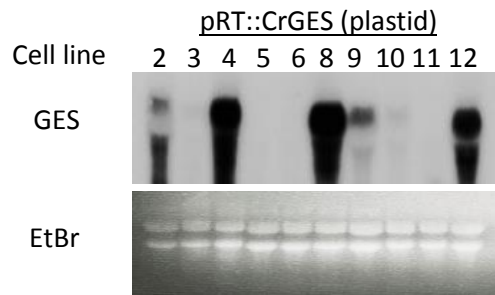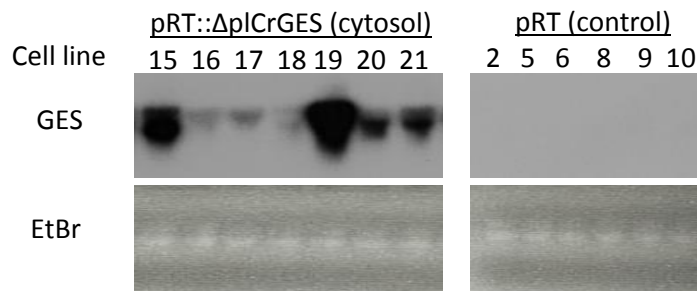**B**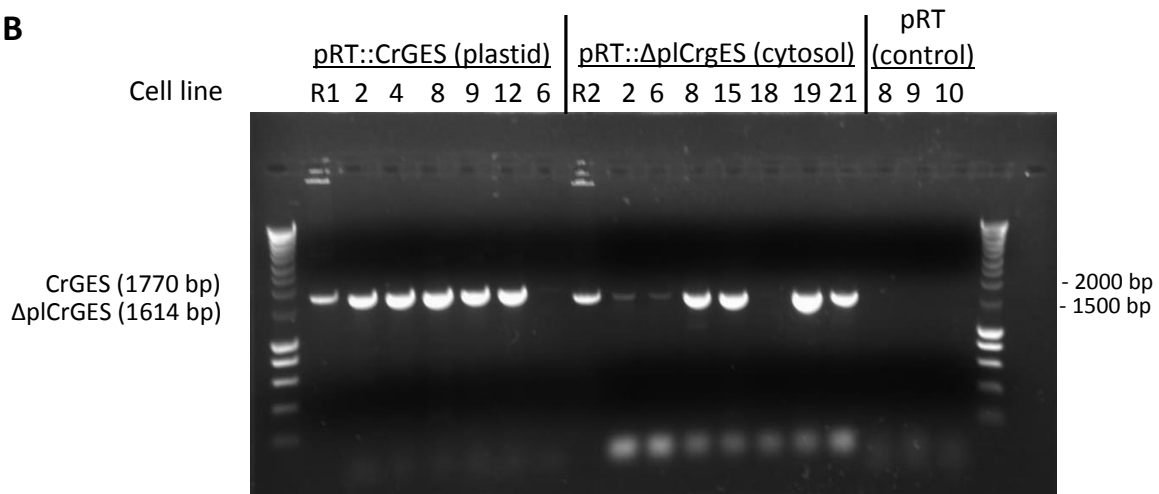

**Supplement 4** Northern blot (A) and reverse transcriptase PCR (B) analysis of some transgenic *Catharanthus roseus* cell lines overexpressing *CrGES* (plastid) and  $\Delta$ pl*CrGES* (cytosol). The ethidium bromide stained gel (EtBr) in Northern blot is shown as a control for RNA loading. R1 and R2 is the *CrGES* and  $\Delta$ pl*CrGES* fragments, respectively, which are used as reference for comparing the sizes of the bands
