# Supplementary material for: Metabolic alteration of Catharanthus roseus cell suspension cultures overexpressing geraniol synthase in the plastids or cytosol
Source: PubMed Central journal article supplement (PMC6445406; doi:10.1007/s11240-018-1398-5), 2018-02-24
Supplement: 11240_2018_1398_MOESM5_ESM.pdf [file 11240_2018_1398_MOESM5_ESM.pdf]

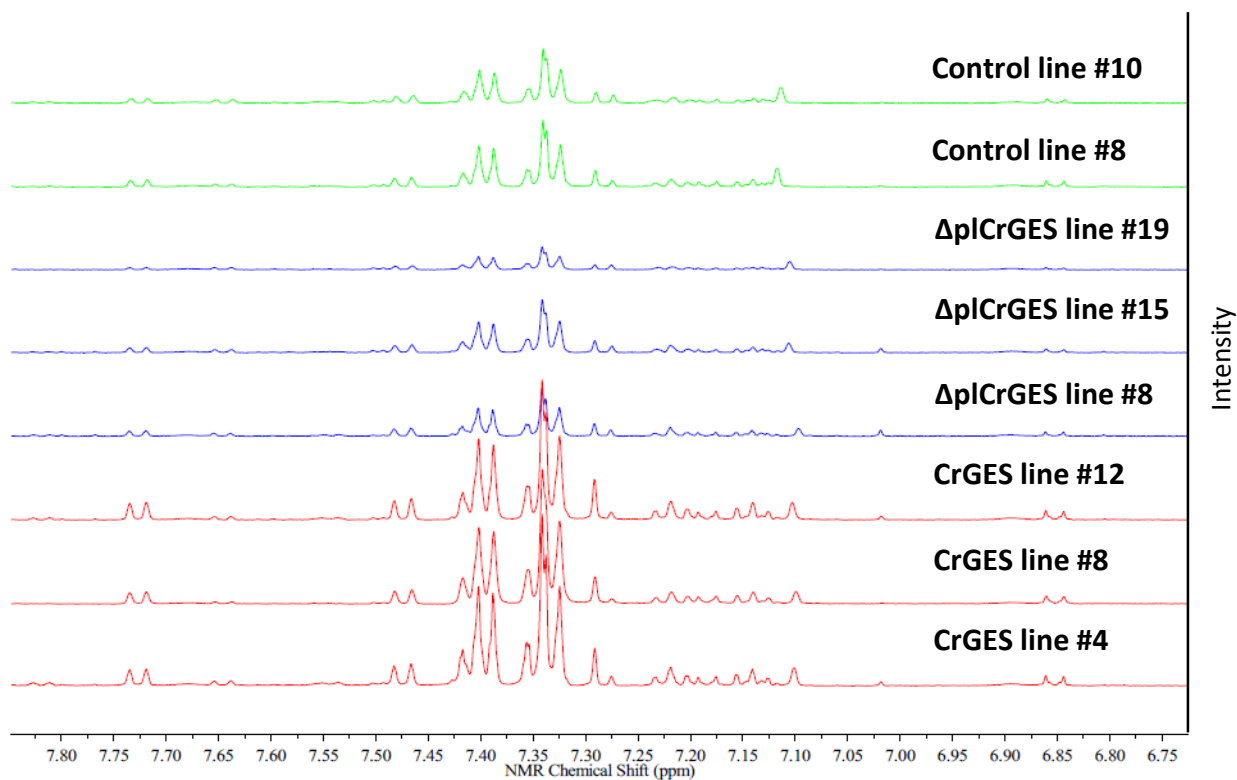

**Supplement 5** Comparison of  $^1\text{H}$ -NMR spectra of aromatic region of two *Catharanthus roseus* control lines (transformed with empty vector) versus different cell lines constitutively expressing *CrGES* and  $\Delta$ pICrGES.
